# Supplementary material for: Loss of multilevel 3D genome organization during breast cancer progression
Source: HighWire-hosted journal article supplement (doi:10.1101/gr.280791.125), 2025-10-09
Supplement: Supplemental_File_S1.xlsx [file Supplemental_File_S1.xlsx]

## Sheet: 10A-r1 vs 10A-r2
chrom	scc
chr1	0.997312
chr2	0.996009
chr3	0.9954
chr4	0.994424
chr5	0.99615
chr6	0.995137
chr7	0.997149
chr8	0.997334
chr9	0.996193
chr10	0.996025
chr11	0.996635
chr12	0.996088
chr13	0.994931
chr14	0.995803
chr15	0.997198
chr16	0.997843
chr17	0.997168
chr18	0.996544
chr19	0.997283
chr20	0.99672
chr21	0.996765
chr22	0.996948
chrX	0.995632
Supplemental File S1: This file contains the Stratified Correlation Coefficients (SCC) for each chromosome, generated using the Python implementation of HiCRep v0.2.6. All pairwise comparisons between samples are provided as separate tabs.

## Sheet: 10A-r1 vs T1-r1
chrom	scc
chr1	0.801799
chr2	0.907655
chr3	0.891142
chr4	0.886523
chr5	0.920466
chr6	0.86178
chr7	0.925576
chr8	0.824101
chr9	0.911555
chr10	0.894746
chr11	0.911575
chr12	0.907194
chr13	0.861343
chr14	0.877956
chr15	0.951509
chr16	0.898167
chr17	0.945097
chr18	0.931409
chr19	0.869822
chr20	0.912191
chr21	0.84504
chr22	0.952306
chrX	0.85288

## Sheet: 10A-r1 vs T1-r2
chrom	scc
chr1	0.802629
chr2	0.907955
chr3	0.890719
chr4	0.886141
chr5	0.92118
chr6	0.860798
chr7	0.925841
chr8	0.823582
chr9	0.912823
chr10	0.894246
chr11	0.910843
chr12	0.907008
chr13	0.861812
chr14	0.876961
chr15	0.951654
chr16	0.898569
chr17	0.945045
chr18	0.932159
chr19	0.869458
chr20	0.912385
chr21	0.845165
chr22	0.951903
chrX	0.853562

## Sheet: 10A-r1 vs C1-r1
chrom	scc
chr1	0.777831
chr2	0.807
chr3	0.839337
chr4	0.88812
chr5	0.897122
chr6	0.91584
chr7	0.902362
chr8	0.76191
chr9	0.861137
chr10	0.793864
chr11	0.898352
chr12	0.881727
chr13	0.873582
chr14	0.911067
chr15	0.951227
chr16	0.825209
chr17	0.881299
chr18	0.889504
chr19	0.840797
chr20	0.880663
chr21	0.918894
chr22	0.90835
chrX	0.905639

## Sheet: 10A-r1 vs C1-r2
chrom	scc
chr1	0.778133
chr2	0.80675
chr3	0.840756
chr4	0.889532
chr5	0.897779
chr6	0.916881
chr7	0.902424
chr8	0.762609
chr9	0.861277
chr10	0.794131
chr11	0.89831
chr12	0.88225
chr13	0.874581
chr14	0.9117
chr15	0.950537
chr16	0.826233
chr17	0.882362
chr18	0.888149
chr19	0.840611
chr20	0.881227
chr21	0.919357
chr22	0.908582
chrX	0.904974

## Sheet: 10A-2 vs T1-r1
chrom	scc
chr1	0.801074
chr2	0.907803
chr3	0.890026
chr4	0.887224
chr5	0.920172
chr6	0.863248
chr7	0.925345
chr8	0.824999
chr9	0.91112
chr10	0.895612
chr11	0.911233
chr12	0.906953
chr13	0.861794
chr14	0.878363
chr15	0.952716
chr16	0.897485
chr17	0.945623
chr18	0.931805
chr19	0.871664
chr20	0.912424
chr21	0.845081
chr22	0.953035
chrX	0.853095

## Sheet: 10A-r2 vs T1-r2
chrom	scc
chr1	0.801996
chr2	0.908023
chr3	0.889426
chr4	0.886642
chr5	0.921099
chr6	0.862335
chr7	0.925556
chr8	0.824684
chr9	0.912275
chr10	0.894968
chr11	0.910635
chr12	0.906827
chr13	0.862294
chr14	0.87721
chr15	0.952808
chr16	0.897939
chr17	0.945817
chr18	0.932423
chr19	0.871617
chr20	0.912332
chr21	0.845289
chr22	0.952542
chrX	0.853872

## Sheet: 10A-r2 vs C1-r1
chrom	scc
chr1	0.777182
chr2	0.807507
chr3	0.838497
chr4	0.890504
chr5	0.897376
chr6	0.916566
chr7	0.902704
chr8	0.762766
chr9	0.862143
chr10	0.794881
chr11	0.897886
chr12	0.878859
chr13	0.874845
chr14	0.912553
chr15	0.951291
chr16	0.823307
chr17	0.883139
chr18	0.890876
chr19	0.844024
chr20	0.880859
chr21	0.919132
chr22	0.909216
chrX	0.90529

## Sheet: 10A-r2 vs C1-r2
chrom	scc
chr1	0.777553
chr2	0.807179
chr3	0.839975
chr4	0.89164
chr5	0.897928
chr6	0.91779
chr7	0.9029
chr8	0.763361
chr9	0.862427
chr10	0.795368
chr11	0.897862
chr12	0.879421
chr13	0.875696
chr14	0.913079
chr15	0.9507
chr16	0.824298
chr17	0.884086
chr18	0.889546
chr19	0.843791
chr20	0.881435
chr21	0.919629
chr22	0.909157
chrX	0.904629

## Sheet: T1-r1 vs T1-r2
chrom	scc
chr1	0.995643
chr2	0.99661
chr3	0.996521
chr4	0.995147
chr5	0.996794
chr6	0.996585
chr7	0.997546
chr8	0.996895
chr9	0.997744
chr10	0.996592
chr11	0.997234
chr12	0.99716
chr13	0.997318
chr14	0.997395
chr15	0.997523
chr16	0.998588
chr17	0.997555
chr18	0.997002
chr19	0.998347
chr20	0.997051
chr21	0.998881
chr22	0.996721
chrX	0.996502

[truncated: 5 more sheets: T1-r1 vs C1-r1, T1-r1 vs C1-r2 , T1-r2 vs C1-r1, T1-r2 vs C1-r2, C1-r1 vs C1-r2]
